# Supplementary material
Source: PubMed Central journal article supplement (PMC6375387)
Supplement: ehp2732.s001.acco.pdf [file ehp2732.s001.acco.pdf]

**Note to readers with disabilities:** *EHP* strives to ensure that all journal content is accessible to all readers. However, some figures and Supplemental Material published in *EHP* articles may not conform to [508 standards](#) due to the complexity of the information being presented. If you need assistance accessing journal content, please contact [ehp508@niehs.nih.gov](mailto:ehp508@niehs.nih.gov). Our staff will work with you to assess and meet your accessibility needs within 3 working days.

### **Supplemental Material**

#### **A National Multicity Analysis of the Causal Effect of Local Pollution, NO<sub>2</sub>, and PM<sub>2.5</sub> on Mortality**

Joel Schwartz, Kelvin Fong, and Antonella Zanobetti

#### **Table of Contents**

**Table S1.** City-specific mean and standard deviation (SD) for all-cause mortality, NO<sub>2</sub> and PM<sub>2.5</sub> concentrations (1999-2010).

**Table S2.** City-specific mean and standard deviation (SD) for the weather variables (1999-2010).

## Supplemental Material

Table S 1. City-specific mean and standard deviation (SD) for all-cause mortality, NO<sub>2</sub> and PM<sub>2.5</sub> concentrations (1999-2010).

| City                | Daily Deaths |        | PM2.5 (µg/m3) |       | NO2 (ppb) <sup>1</sup> |       | N <sup>2</sup> |
|---------------------|--------------|--------|---------------|-------|------------------------|-------|----------------|
|                     | Mean         | SD     | Mean          | SD    | Mean                   | SD    |                |
| AKRON (OH)          | 16.857       | 11.509 | 15.56         | 7.60  |                        |       | 2826           |
| ANAHEIM (CA)        | 43.716       | 7.912  | 18.06         | 11.09 | 25.14                  | 11.41 | 1618           |
| BOSTON (MA)         | 55.485       | 9.327  | 11.55         | 5.87  | 16.45                  | 5.87  | 3641           |
| CANTON (OH)         | 9.991        | 3.481  | 15.15         | 7.66  |                        |       | 957            |
| CHARLOTTE (NC)      | 11.773       | 3.580  | 14.29         | 6.15  | 14.76                  | 6.26  | 3804           |
| CLEVELAND (OH)      | 59.939       | 35.952 | 15.14         | 7.84  | 19.49                  | 6.12  | 2825           |
| CORPUS CHRISTI (TX) | 6.786        | 2.678  | 9.91          | 4.37  |                        |       | 2566           |
| DAYTONA BEACH (FL)  | 15.014       | 4.116  | 9.60          | 4.95  |                        |       | 1829           |
| ERIE (PA)           | 6.898        | 2.722  | 12.20         | 7.12  | 11.18                  | 4.80  | 3052           |
| FLINT (MI)          | 9.944        | 3.142  | 11.97         | 7.60  |                        |       | 1763           |
| FRESNO (CA)         | 14.478       | 4.088  | 19.16         | 16.25 | 15.59                  | 6.15  | 3407           |
| GRAND RAPIDS (MI)   | 10.348       | 3.346  | 13.00         | 7.49  | 15.74                  | 5.97  | 3638           |
| HARTFORD (CT)       | 19.950       | 4.940  | 11.54         | 6.60  | 16.44                  | 7.60  | 2461           |
| INDIANAPOLIS (IN)   | 18.768       | 4.665  | 15.64         | 7.05  | 15.19                  | 5.42  | 2680           |
| LANSING (MI)        | 4.819        | 2.160  | 12.27         | 7.61  | 13.35                  | 5.03  | 1843           |
| LOUISVILLE (KY)     | 17.509       | 4.549  | 14.98         | 6.93  | 16.52                  | 5.27  | 3800           |
| MIAMI (FL)          | 47.509       | 7.312  | 9.35          | 3.94  | 10.98                  | 5.04  | 1400           |
| MINNEAPOLIS (MN)    | 29.280       | 6.159  | 10.72         | 6.48  | 18.22                  | 6.16  | 2937           |
| NEW ORLEANS (LA)    | 21.586       | 6.144  | 12.69         | 5.47  | 13.47                  | 5.19  | 2879           |
| NORFOLK (VA)        | 24.924       | 5.410  | 12.76         | 6.20  | 16.62                  | 5.59  | 2765           |
| PLYMOUTH (MA)       | 10.261       | 3.253  | 10.67         | 6.90  |                        |       | 1405           |
| PROVIDENCE (RI)     | 27.243       | 8.778  | 10.24         | 5.52  | 9.17                   | 5.17  | 4176           |
| RICHMOND (VA)       | 15.411       | 4.210  | 13.83         | 6.50  | 17.62                  | 6.78  | 2768           |
| SACRAMENTO (CA)     | 24.145       | 5.354  | 12.52         | 10.38 | 12.90                  | 5.40  | 3330           |
| SAN FRANCISCO (CA)  | 28.409       | 5.851  | 11.96         | 9.45  | 19.12                  | 8.40  | 1534           |
| SCRANTON (PA)       | 18.270       | 4.668  | 11.52         | 6.82  | 12.58                  | 5.62  | 3872           |
| SPOKANE (WA)        | 9.094        | 3.077  | 9.16          | 6.53  |                        |       | 2353           |
| TRENTON (NJ)        | 7.038        | 2.751  | 12.25         | 7.59  | 15.56                  | 6.45  | 1730           |

|                      |         |        |       |       |       |       |      |
|----------------------|---------|--------|-------|-------|-------|-------|------|
| WILMINGTON (DE)      | 9.928   | 3.259  | 14.80 | 7.33  | 17.69 | 8.10  | 2681 |
| CEDAR RAPIDS (IA)    | 3.879   | 1.953  | 11.01 | 6.57  | 3.75  | 1.82  | 2532 |
| EVANSVILLE (IN)      | 4.639   | 2.176  | 15.06 | 7.88  | 11.79 | 4.53  | 1819 |
| GRAND HAVEN (MI)     | 10.345  | 3.347  | 12.99 | 7.48  | 15.72 | 5.95  | 3636 |
| NEW LONDON (CT)      | 5.443   | 2.319  | 11.15 | 7.00  |       |       | 1212 |
| STATE COLLEGE (PA)   | 2.528   | 1.432  | 11.92 | 7.11  | 7.88  | 4.12  | 1271 |
| ALBANY (NY)          | 7.400   | 2.794  | 11.23 | 7.75  | 14.51 | 2.71  | 1678 |
| ANN ARBOR (MI)       | 4.681   | 2.213  | 13.56 | 8.19  |       |       | 1769 |
| AUSTIN (TX)          | 9.830   | 3.327  | 10.02 | 4.68  | 4.53  | 2.60  | 1490 |
| BATON ROUGE (LA)     | 8.774   | 3.146  | 13.41 | 5.45  | 12.19 | 4.25  | 2920 |
| BOULDER (CO)         | 3.532   | 1.723  | 8.40  | 4.40  |       |       | 1454 |
| CHATTANOOGA (TN)     | 7.982   | 2.876  | 14.18 | 6.90  |       |       | 1478 |
| DALLAS (TX)          | 35.159  | 6.808  | 11.97 | 5.11  | 13.87 | 6.06  | 3871 |
| DENVER (CO)          | 24.297  | 5.227  | 10.19 | 4.56  | 22.81 | 8.48  | 2804 |
| EAST ST. LOUIS (IL)  | 5.860   | 2.453  | 15.66 | 7.74  | 16.93 | 4.67  | 1818 |
| ESSEX (MA)           | 16.399  | 4.527  | 9.93  | 6.83  | 8.19  | 4.69  | 1480 |
| FORT LAUDERDALE (FL) | 39.599  | 6.810  | 8.38  | 3.69  | 8.61  | 4.82  | 2853 |
| GREENSBORO (NC)      | 8.784   | 3.127  | 14.35 | 6.51  |       |       | 2624 |
| JACKSONVILLE (FL)    | 16.907  | 4.367  | 10.52 | 4.89  | 13.95 | 5.57  | 2688 |
| KNOXVILLE (TN)       | 11.573  | 3.631  | 15.59 | 6.82  | 7.84  | 5.45  | 2295 |
| MOBILE (AL)          | 9.823   | 3.166  | 12.91 | 6.17  |       |       | 1604 |
| NASHUA (NH)          | 6.959   | 2.688  | 9.06  | 6.32  | 6.78  | 4.58  | 749  |
| NEW YORK (NY)        | 148.179 | 18.383 | 14.56 | 7.37  | 29.68 | 7.54  | 2700 |
| OAKLAND (CA)         | 42.619  | 7.492  | 11.58 | 9.17  | 15.13 | 5.66  | 1524 |
| ORLANDO (FL)         | 22.728  | 5.040  | 10.01 | 4.43  | 10.75 | 4.75  | 2867 |
| PHILADELPHIA (PA)    | 112.496 | 15.217 | 14.14 | 7.33  | 21.20 | 6.65  | 2645 |
| PORT ARTHUR (TX)     | 6.694   | 2.630  | 11.19 | 5.61  | 7.21  | 3.66  | 2601 |
| RALEIGH (NC)         | 9.006   | 3.181  | 13.51 | 6.00  |       |       | 3808 |
| RIVERSIDE (CA)       | 64.270  | 9.921  | 16.25 | 10.11 | 19.98 | 6.45  | 2867 |
| SALT LAKE CITY (UT)  | 12.738  | 3.697  | 11.16 | 10.05 | 23.10 | 10.42 | 3987 |
| SAN JOSE (CA)        | 22.817  | 5.185  | 11.94 | 9.47  | 21.79 | 9.13  | 2211 |
| SEATTLE (WA)         | 29.285  | 5.901  | 9.42  | 5.40  | 18.32 | 6.66  | 3028 |
| SPRINGFIELD (MA)     | 11.744  | 3.728  | 11.99 | 7.05  | 14.91 | 6.16  | 2199 |
| STAMFORD (CT)        | 17.248  | 4.499  | 12.59 | 7.93  | 16.82 | 7.39  | 1885 |
| TAMPA (FL)           | 21.852  | 5.196  | 11.66 | 4.61  | 8.39  | 4.06  | 2193 |
| TUCSON (AZ)          | 19.044  | 4.795  | 6.44  | 2.78  | 15.42 | 5.95  | 3296 |
| WASHINGTON (DC)      | 19.875  | 9.884  | 14.13 | 7.05  | 19.98 | 6.88  | 3961 |
| WINSTON-SALEM (NC)   | 7.085   | 2.751  | 13.84 | 6.67  | 13.38 | 6.30  | 3850 |

|                    |         |        |       |       |       |      |      |
|--------------------|---------|--------|-------|-------|-------|------|------|
| BATH (NY)          | 2.694   | 1.463  | 8.82  | 5.61  | 1.86  | 1.48 | 2743 |
| FARGO (ND)         | 2.254   | 1.234  | 7.96  | 5.07  | 6.00  | 3.18 | 1516 |
| ALBUQUERQUE (NM)   | 10.859  | 3.528  | 6.87  | 3.19  | 16.03 | 6.31 | 1951 |
| ATLANTA (GA)       | 42.688  | 7.556  | 16.60 | 7.11  | 16.83 | 7.35 | 3277 |
| BAKERSFIELD (CA)   | 12.738  | 3.845  | 17.31 | 14.25 | 14.73 | 5.17 | 3279 |
| BROWNSVILLE (TX)   | 5.046   | 2.320  | 9.82  | 4.95  |       |      | 1339 |
| CHARLESTON (SC)    | 6.878   | 2.736  | 11.39 | 5.07  | 6.83  | 3.88 | 3785 |
| CHICAGO (IL)       | 133.149 | 15.918 | 15.14 | 7.29  | 22.40 | 6.22 | 2541 |
| COLUMBIA (SC)      | 10.795  | 3.431  | 14.19 | 5.91  | 7.14  | 3.48 | 2368 |
| DAVENPORT (IA)     | 6.819   | 2.649  | 12.39 | 6.61  | 6.05  | 3.04 | 2731 |
| DES MOINES (IA)    | 7.125   | 2.693  | 10.34 | 5.88  | 11.46 | 4.10 | 2722 |
| EL PASO (TX)       | 10.548  | 3.490  | 10.91 | 5.62  | 16.35 | 6.41 | 2445 |
| EUGENE (OR)        | 7.345   | 2.731  | 9.20  | 8.18  |       |      | 2732 |
| GARY (IN)          | 11.577  | 3.591  | 15.49 | 7.44  | 18.78 | 6.69 | 1791 |
| GREENVILLE (SC)    | 8.272   | 3.011  | 14.53 | 6.31  | 12.95 | 5.99 | 3398 |
| JERSEY CITY (NJ)   | 11.323  | 3.448  | 15.21 | 8.94  | 24.26 | 8.39 | 1736 |
| LITTLE ROCK (AR)   | 8.198   | 2.930  | 13.47 | 5.97  | 11.80 | 4.89 | 3820 |
| MADISON (WI)       | 6.688   | 2.700  | 12.03 | 7.40  |       |      | 1226 |
| MEMPHIS (TN)       | 19.297  | 4.796  | 13.50 | 6.35  | 18.55 | 9.89 | 2260 |
| MIDDLETOWN (OH)    | 6.942   | 2.803  | 16.15 | 7.58  |       |      | 2374 |
| NASHVILLE (TN)     | 12.386  | 3.674  | 13.91 | 6.18  | 15.90 | 7.28 | 1823 |
| PALM BEACH (FL)    | 33.080  | 6.204  | 7.95  | 3.54  | 13.34 | 4.91 | 2821 |
| PHOENIX (AZ)       | 58.934  | 8.946  | 9.07  | 3.89  | 18.42 | 7.48 | 744  |
| PORTLAND (ME)      | 5.983   | 2.488  | 10.85 | 6.54  | 16.85 | 6.09 | 1561 |
| READING (PA)       | 9.206   | 3.222  | 15.78 | 9.44  | 18.81 | 5.86 | 1754 |
| ROCHESTER (NY)     | 16.224  | 4.227  | 11.13 | 7.20  |       |      | 1542 |
| SAN ANTONIO (TX)   | 25.894  | 5.578  | 9.82  | 4.39  | 9.23  | 3.91 | 1133 |
| SOUTH BEND (IN)    | 6.081   | 2.482  | 13.36 | 7.77  | 12.61 | 5.56 | 1210 |
| STEUBENVILLE (OH)  | 3.826   | 1.923  | 16.33 | 8.59  |       |      | 1746 |
| TOLEDO (OH)        | 11.680  | 3.700  | 15.05 | 7.73  |       |      | 1042 |
| TULSA (OK)         | 13.378  | 3.876  | 10.87 | 5.39  | 9.75  | 5.11 | 822  |
| WASHINGTON (PA)    | 6.207   | 2.548  | 14.59 | 7.22  | 11.21 | 4.13 | 2681 |
| WORCESTER (MA)     | 17.257  | 4.648  | 11.22 | 6.52  | 16.94 | 6.21 | 1976 |
| GREEN BAY (WI)     | 4.176   | 1.997  | 11.34 | 7.53  |       |      | 1360 |
| KALAMAZOO (MI)     | 4.806   | 2.186  | 13.85 | 8.10  |       |      | 1794 |
| TOPEKA (KS)        | 4.270   | 2.092  | 10.84 | 5.80  |       |      | 1804 |
| ANNANDALE (VA)     | 10.229  | 3.258  | 14.13 | 6.96  | 15.75 | 5.74 | 2307 |
| ALLENTOWN (PA)     | 8.022   | 2.921  | 13.87 | 7.62  | 14.26 | 6.24 | 2727 |
| ATLANTIC CITY (NJ) | 6.556   | 2.725  | 11.26 | 7.18  |       |      | 933  |

|                     |         |        |       |      |       |       |      |
|---------------------|---------|--------|-------|------|-------|-------|------|
| BALTIMORE (MD)      | 38.667  | 7.163  | 15.41 | 7.65 | 19.67 | 6.36  | 2509 |
| BIRMINGHAM (AL)     | 22.856  | 5.822  | 16.39 | 7.76 | 10.08 | 4.20  | 2918 |
| BUFFALO (NY)        | 25.567  | 5.603  | 13.13 | 8.09 | 16.42 | 6.30  | 1769 |
| CHARLESTON (WV)     | 6.263   | 2.557  | 16.26 | 8.12 |       |       | 1916 |
| CINCINNATI (OH)     | 25.768  | 16.646 | 16.72 | 7.53 | 20.28 | 6.05  | 2884 |
| COLUMBUS (OH)       | 24.945  | 15.759 | 15.76 | 7.41 |       |       | 2800 |
| DETROIT (MI)        | 90.620  | 11.841 | 15.42 | 8.04 | 19.12 | 7.15  | 2536 |
| ELIZABETH (NJ)      | 11.503  | 3.594  | 14.72 | 7.88 | 37.04 | 10.31 | 1909 |
| FORT WORTH (TX)     | 24.379  | 5.426  | 11.93 | 5.16 | 12.37 | 5.42  | 2728 |
| GETTYSBURG (PA)     | 2.487   | 1.348  | 12.61 | 7.10 | 3.28  | 2.03  | 2457 |
| HARRISBURG (PA)     | 6.247   | 2.521  | 15.42 | 8.19 | 15.91 | 6.76  | 2193 |
| HOUSTON (TX)        | 53.002  | 9.209  | 12.78 | 4.83 | 13.24 | 5.50  | 3692 |
| KANSAS CITY (KS)    | 28.195  | 5.918  | 11.96 | 5.41 | 13.50 | 4.61  | 2844 |
| LANCASTER (PA)      | 11.027  | 3.469  | 16.62 | 9.92 | 13.90 | 5.68  | 1759 |
| LOS ANGELES (CA)    | 151.029 | 18.108 | 16.81 | 9.29 | 25.81 | 8.60  | 2996 |
| MILWAUKEE (WI)      | 28.972  | 5.800  | 12.95 | 7.48 | 16.84 | 6.08  | 2701 |
| NEW HAVEN (CT)      | 19.419  | 4.785  | 12.58 | 6.98 | 19.53 | 7.76  | 2475 |
| OKLAHOMA CITY (OK)  | 15.767  | 4.251  | 9.55  | 4.60 | 9.67  | 4.29  | 818  |
| PATERSON (NJ)       | 28.174  | 6.077  | 13.25 | 8.36 | 20.54 | 8.19  | 1675 |
| PITTSBURGH (PA)     | 42.422  | 9.928  | 15.22 | 8.76 | 17.32 | 7.06  | 3807 |
| PORTLAND (OR)       | 27.649  | 5.837  | 9.13  | 5.78 | 12.33 | 4.54  | 2439 |
| RENO (NV)           | 7.126   | 2.705  | 7.94  | 6.04 | 17.84 | 6.75  | 1067 |
| SAN DIEGO (CA)      | 49.377  | 8.374  | 12.25 | 6.55 | 17.86 | 7.49  | 3413 |
| SARASOTA (FL)       | 20.037  | 4.950  | 9.44  | 4.97 | 5.20  | 3.02  | 1836 |
| ST. LOUIS (MO)      | 38.235  | 7.237  | 14.26 | 6.62 | 16.78 | 5.53  | 2875 |
| TACOMA (WA)         | 13.397  | 3.883  | 11.01 | 8.70 |       |       | 2400 |
| UPPER MARLBORO (MD) | 10.847  | 3.308  | 13.73 | 7.81 | 10.91 | 5.12  | 1743 |
| WICHITA (KS)        | 9.376   | 3.254  | 10.81 | 5.62 | 10.20 | 4.37  | 1850 |
| YORK (PA)           | 8.263   | 2.930  | 17.70 | 9.33 | 18.04 | 7.03  | 691  |
| GREENSBURG (PA)     | 11.199  | 3.510  | 15.45 | 8.61 | 14.75 | 5.10  | 1637 |
| KENOSHA (WI)        | 3.226   | 1.655  | 11.53 | 7.26 |       |       | 1381 |

1. NO2 data were only available in 105 cities.
2. N is the number of days pollution data were available in that city

Table S 2. City-specific mean and standard deviation (SD) for the weather variables (1999-2010).

| City                | Temperature (°F) |        | Wind Speed (knots) |       | Pressure (mbar) |        | PBL Height (m) |        |
|---------------------|------------------|--------|--------------------|-------|-----------------|--------|----------------|--------|
|                     | Mean             | SD     | Mean               | SD    | Mean            | SD     | Mean           | SD     |
| AKRON (OH)          | 50.773           | 18.013 | 6.7196             | 3.265 | 1020            | 6.8497 | 739.93         | 275.63 |
| ANAHEIM (CA)        | 62.964           | 7.2702 | 3.6156             | 1.473 | 1015.3          | 3.6918 | 602.66         | 237.71 |
| BOSTON (MA)         | 52.124           | 16.746 | 9.5538             | 3.218 | 1016            | 7.8468 | 792.3          | 355.8  |
| CANTON (OH)         | 49.856           | 17.907 | 7.6857             | 3.158 | 1016.9          | 6.5758 | 753.48         | 294.13 |
| CHARLOTTE (NC)      | 60.824           | 14.647 | 5.0748             | 2.222 | 1018.1          | 5.9374 | 797.67         | 334.1  |
| CLEVELAND (OH)      | 52.884           | 17.713 | 9.4845             | 3.978 | 1017            | 6.7668 | 795.93         | 312.02 |
| CORPUS CHRISTI (TX) | 72.287           | 11.36  | 9.5016             | 3.548 | 1015.8          | 5.4871 | 817.86         | 231.04 |
| DAYTONA BEACH (FL)  | 70.536           | 9.8622 | 5.8496             | 2.709 | 1018.6          | 4.2934 | 773.77         | 291.77 |
| ERIE (PA)           | 49.808           | 17.689 | 8.3605             | 3.348 | 1017            | 7.0489 | 873.85         | 350.75 |
| FLINT (MI)          | 48.835           | 18.665 | 7.632              | 3.106 | 1017            | 7.0483 | 749.11         | 275.24 |
| FRESNO (CA)         | 64.357           | 14.12  | 5.0895             | 2.533 | 1015.7          | 5.3591 | 960.59         | 478.37 |
| GRAND RAPIDS (MI)   | 48.556           | 18.775 | 8.2158             | 3.308 | 1016.8          | 7.0483 | 731.86         | 282.26 |
| HARTFORD (CT)       | 52.269           | 17.218 | 5.8466             | 2.608 | 1016.5          | 7.4886 | 819.78         | 350.92 |
| INDIANAPOLIS (IN)   | 53.893           | 18.268 | 8.2953             | 3.276 | 1017.4          | 6.5178 | 749.16         | 284.98 |
| LANSING (MI)        | 48.786           | 18.521 | 7.6991             | 3.282 | 1017            | 6.9509 | 727.66         | 264.2  |
| LOUISVILLE (KY)     | 57.852           | 17.613 | 6.6658             | 2.918 | 1017.8          | 6.2134 | 794.56         | 290.6  |
| MIAMI (FL)          | 76.565           | 6.4495 | 6.9536             | 2.546 | 1017.4          | 3.2876 | 803.06         | 277.97 |
| MINNEAPOLIS (MN)    | 48.067           | 21.963 | 8.0462             | 3.052 | 1016            | 7.6099 | 815.24         | 342.37 |
| NEW ORLEANS (LA)    | 71.835           | 12.171 | 8.4126             | 3.616 | 1017.8          | 4.9984 | 694.34         | 227.5  |
| NORFOLK (VA)        | 60.872           | 15.094 | 7.9334             | 3.425 | 1017.5          | 6.4923 | 747.43         | 337.55 |
| PLYMOUTH (MA)       | 51.297           | 16.146 | 6.7477             | 3.124 | 1016.2          | 7.6429 | 711.95         | 347.71 |
| PROVIDENCE (RI)     | 52.734           | 16.623 | 7.8802             | 3.158 | 1015.8          | 7.8668 | 785.79         | 347.31 |
| RICHMOND (VA)       | 59.211           | 15.853 | 6.6125             | 2.852 | 1018            | 6.5392 | 803.95         | 380.48 |
| SACRAMENTO (CA)     | 60.121           | 10.989 | 5.3597             | 2.787 | 1015.8          | 5.2533 | 774.59         | 372.3  |
| SAN FRANCISCO (CA)  | 55.495           | 5.0031 | 7.6595             | 3.846 | 1017.7          | 4.9207 | 430.86         | 303.43 |
| SCRANTON (PA)       | 50.054           | 17.698 | 5.5155             | 2.584 | 1016.4          | 7.1432 | 895.2          | 314.73 |
| SPOKANE (WA)        | 49.392           | 15.137 | 4.5188             | 2.671 | 1016.8          | 7.1928 | 931.39         | 445.8  |
| TRENTON (NJ)        | 53.907           | 16.992 | 6.2324             | 2.602 | 1016.3          | 7.0964 | 798.25         | 365.21 |
| WILMINGTON (DE)     | 54.67            | 16.909 | 7.4704             | 3.159 | 1017.5          | 6.999  | 813.88         | 362.2  |
| CEDAR RAPIDS (IA)   | 49.504           | 19.832 | 8.5352             | 3.528 | 1016.4          | 7.0511 | 759.7          | 298.52 |

|                      |        |        |        |       |        |        |        |        |
|----------------------|--------|--------|--------|-------|--------|--------|--------|--------|
| EVANSVILLE (IN)      | 57.254 | 17.366 | 5.898  | 2.836 | 1018   | 6.237  | 765.2  | 307.28 |
| GRAND HAVEN (MI)     | 48.574 | 18.767 | 8.2131 | 3.309 | 1016.8 | 7.056  | 756.1  | 334.59 |
| NEW LONDON (CT)      | 51.544 | 15.739 | 7.8224 | 3.381 | 1015.8 | 7.5488 | 744.46 | 397.48 |
| STATE COLLEGE (PA)   | 50.224 | 17.537 | 5.203  | 3.201 | 1015.4 | 7.2892 | 871.87 | 312.49 |
| ALBANY (NY)          | 49.5   | 18.672 | 6.601  | 3.318 | 1016.6 | 7.3503 | 1048.7 | 357.23 |
| ANN ARBOR (MI)       | 49.611 | 18.328 | 7.7924 | 3.358 | 1018.3 | 6.9157 | 767.71 | 282.72 |
| AUSTIN (TX)          | 67.829 | 14.182 | 5.3102 | 2.304 | 1016.7 | 6.0565 | 902.34 | 317.34 |
| BATON ROUGE (LA)     | 67.562 | 12.857 | 5.0847 | 2.46  | 1017.5 | 5.1462 | 690.68 | 242.35 |
| BOULDER (CO)         | 54.713 | 17.945 | 8.1076 | 3.195 | 1013.8 | 6.9978 | 1892.8 | 601.9  |
| CHATTANOOGA (TN)     | 60.062 | 15.136 | 4.3568 | 2.568 | 1018.5 | 5.5002 | 828.75 | 274.89 |
| DALLAS (TX)          | 67.301 | 15.675 | 8.244  | 3.332 | 1016.4 | 6.2143 | 925.14 | 356.19 |
| DENVER (CO)          | 51.262 | 17.103 | 7.0133 | 2.104 | 1014.7 | 7.102  | 1940.9 | 653.45 |
| EAST ST. LOUIS (IL)  | 56.758 | 17.843 | 6.1078 | 2.833 | 1017.8 | 6.4875 | 785.2  | 301.69 |
| ESSEX (MA)           | 49.011 | 16.817 | 7.0695 | 2.949 | 1015.3 | 8.0075 | 767.08 | 381.17 |
| FORT LAUDERDALE (FL) | 76.361 | 6.8652 | 7.902  | 3.009 | 1017   | 3.4779 | 813.06 | 293.73 |
| GREENSBORO (NC)      | 59.625 | 15.171 | 6.0219 | 2.578 | 1018   | 5.9897 | 854.44 | 350.62 |
| JACKSONVILLE (FL)    | 70.085 | 11.664 | 7.4166 | 2.748 | 1017.7 | 4.6952 | 742.7  | 273.16 |
| KNOXVILLE (TN)       | 59.834 | 15.575 | 5.3272 | 2.724 | 1017.9 | 5.5066 | 970.08 | 332.13 |
| MOBILE (AL)          | 66.12  | 12.923 | 6.5637 | 2.69  | 1018.5 | 5.0169 | 696.7  | 226.91 |
| NASHUA (NH)          | 51.926 | 19.068 | 5.324  | 2.896 | 1016.7 | 8.1383 | 858.89 | 359.57 |
| NEW YORK (NY)        | 50.838 | 16.136 | 8.8369 | 3.687 | 1016.2 | 7.8299 | 835.41 | 372.89 |
| OAKLAND (CA)         | 55.58  | 5.8085 | 6.8573 | 3.042 | 1017.8 | 4.7103 | 534.9  | 263.57 |
| ORLANDO (FL)         | 72.029 | 9.249  | 6.3582 | 2.32  | 1018.4 | 4.218  | 733.38 | 225.26 |
| PHILADELPHIA (PA)    | 55.18  | 17.28  | 5.8147 | 3.818 | 1017.5 | 7.161  | 814.23 | 366.17 |
| PORT ARTHUR (TX)     | 68.547 | 12.465 | 7.1587 | 2.962 | 1017.2 | 5.3107 | 666.88 | 238.42 |
| RALEIGH (NC)         | 60.94  | 15.219 | 5.2961 | 2.582 | 1018   | 6.1563 | 779.84 | 324.33 |
| RIVERSIDE (CA)       | 63.705 | 10.301 | 4.5357 | 2.23  | 1014.3 | 3.9939 | 978.54 | 286.56 |
| SALT LAKE CITY (UT)  | 53.263 | 19.121 | 7.1677 | 2.956 | 1015.6 | 7.9336 | 1526.5 | 742.11 |
| SAN JOSE (CA)        | 60.55  | 8.7349 | 6.4228 | 3.005 | 1017.8 | 4.9206 | 570.95 | 187.62 |
| SEATTLE (WA)         | 51.129 | 7.3772 | 9.4435 | 7.047 | 1017.6 | 6.9819 | 1018.4 | 516.78 |
| SPRINGFIELD (MA)     | 51.064 | 18.37  | 6.4964 | 2.847 | 1016.7 | 7.436  | 828.42 | 332.96 |
| STAMFORD (CT)        | 52.105 | 16.76  | 6.6755 | 3.044 | 1016.5 | 7.2585 | 814.22 | 383.01 |
| TAMPA (FL)           | 72.377 | 9.6541 | 5.8803 | 2.011 | 1017.7 | 4.0565 | 709.35 | 231.4  |
| TUCSON (AZ)          | 70.223 | 14.397 | 6.3873 | 1.785 | 1012.4 | 4.6649 | 1353.4 | 470.54 |
| WASHINGTON (DC)      | 58.222 | 16.604 | 7.4727 | 2.88  | 1017.8 | 6.8469 | 843.77 | 394.82 |
| WINSTON-SALEM (NC)   | 59.571 | 15.097 | 4.9056 | 2.279 | 1018.4 | 6.1162 | 913.96 | 384.96 |
| BATH (NY)            | 48.323 | 18.115 | 6.37   | 3.073 | 1016.6 | 7.3343 | 871.18 | 303.85 |
| FARGO (ND)           | 43.875 | 22.672 | 9.811  | 3.923 | 1015.8 | 8.1314 | 854.8  | 384.91 |
| ALBUQUERQUE (NM)     | 58.105 | 15.963 | 7.1736 | 3.055 | 1014.3 | 6.2072 | 1833.2 | 763.41 |
| ATLANTA (GA)         | 61.712 | 14.465 | 4.4918 | 2.432 | 1018.3 | 5.2996 | 776.52 | 263.58 |
| BAKERSFIELD (CA)     | 65.132 | 14.262 | 5.1443 | 1.833 | 1015.4 | 5.2921 | 1196.6 | 493.39 |
| BROWNSVILLE (TX)     | 74.515 | 9.8551 | 9.1767 | 3.372 | 1015.4 | 5.216  | 827.08 | 211.67 |

|                    |        |        |        |       |        |        |        |        |
|--------------------|--------|--------|--------|-------|--------|--------|--------|--------|
| CHARLESTON (SC)    | 65.501 | 13.116 | 6.7588 | 2.633 | 1018.1 | 5.4859 | 772.09 | 309.33 |
| CHICAGO (IL)       | 52.838 | 18.766 | 9.7569 | 3.291 | 1016.8 | 6.9856 | 767.65 | 295.28 |
| COLUMBIA (SC)      | 63.959 | 14.298 | 3.6459 | 2.221 | 1018.2 | 5.7378 | 762.04 | 287.32 |
| DAVENPORT (IA)     | 50.388 | 19.565 | 8.7992 | 3.57  | 1016.9 | 7.0185 | 784.53 | 302.85 |
| DES MOINES (IA)    | 51.88  | 20.144 | 8.5745 | 3.127 | 1016.6 | 7.3652 | 827.48 | 323.02 |
| EL PASO (TX)       | 64.961 | 15.16  | 7.357  | 3.248 | 1012.9 | 5.984  | 1547.1 | 653.82 |
| EUGENE (OR)        | 52.358 | 10.582 | 5.8968 | 2.378 | 1018   | 6.021  | 819.74 | 326.73 |
| GARY (IN)          | 53.84  | 18.806 | 9.0077 | 1.966 | 1016.9 | 6.7927 | 757.86 | 302.94 |
| GREENVILLE (SC)    | 61.653 | 14.457 | 5.9337 | 2.383 | 1018.3 | 5.7453 | 888.9  | 340.28 |
| JERSEY CITY (NJ)   | 50.673 | 16.077 | 8.9154 | 3.831 | 1016.2 | 7.7826 | 841.56 | 374.2  |
| LITTLE ROCK (AR)   | 62.879 | 16.059 | 6.1287 | 2.679 | 1018   | 6.0555 | 782.32 | 295.25 |
| MADISON (WI)       | 47.882 | 19.677 | 6.4977 | 2.657 | 1016.5 | 7.0671 | 759.71 | 279.45 |
| MEMPHIS (TN)       | 63.612 | 16.276 | 6.8942 | 2.799 | 1017.8 | 5.8419 | 780.17 | 308.82 |
| MIDDLETOWN (OH)    | 53.824 | 17.79  | 6.7703 | 2.665 | 1017.6 | 6.1884 | 775    | 281.27 |
| NASHVILLE (TN)     | 60.757 | 16.028 | 5.8125 | 2.359 | 1018.3 | 5.7666 | 800.99 | 295.58 |
| PALM BEACH (FL)    | 75.131 | 7.5076 | 7.7466 | 2.926 | 1017.6 | 3.6054 | 787.44 | 318.33 |
| PHOENIX (AZ)       | 76.062 | 15.933 | 5.3481 | 2.002 | 1011.4 | 5.1708 | 1166.4 | 495.4  |
| PORTLAND (ME)      | 47.892 | 17.254 | 6.5931 | 2.936 | 1015.5 | 8.0489 | 710.36 | 417.74 |
| READING (PA)       | 53.53  | 17.414 | 5.7075 | 3.158 | 1017.4 | 6.9421 | 831.13 | 338.59 |
| ROCHESTER (NY)     | 48.599 | 17.946 | 8.1002 | 3.406 | 1016.4 | 7.1265 | 913.1  | 379.36 |
| SAN ANTONIO (TX)   | 69.704 | 13.446 | 7.5038 | 2.594 | 1016.2 | 5.8215 | 978.33 | 344.8  |
| SOUTH BEND (IN)    | 50.584 | 18.462 | 7.8873 | 3.309 | 1017.3 | 6.6766 | 747.47 | 284.92 |
| STEUBENVILLE (OH)  | 51.856 | 17.29  | 6.853  | 2.985 | 1017.8 | 6.2746 | 820.6  | 311.46 |
| TOLEDO (OH)        | 52.112 | 17.755 | 8.0657 | 3.264 | 1017.4 | 6.541  | 788.4  | 300.13 |
| TULSA (OK)         | 61.711 | 17.217 | 7.8584 | 3.242 | 1016   | 7.1056 | 914.83 | 373.19 |
| WASHINGTON (PA)    | 51.192 | 16.736 | 4.9036 | 2.894 | 1017.7 | 6.4673 | 845.92 | 325.47 |
| WORCESTER (MA)     | 48.911 | 17.47  | 8.8801 | 3.21  | 1016.3 | 7.4749 | 810.25 | 332.47 |
| GREEN BAY (WI)     | 46.742 | 19.704 | 7.5685 | 3.13  | 1016.1 | 7.2931 | 760.67 | 283.93 |
| KALAMAZOO (MI)     | 49.831 | 18.31  | 7.0358 | 3.016 | 1017.1 | 6.7959 | 715.46 | 273.9  |
| TOPEKA (KS)        | 55.974 | 19.199 | 6.5676 | 3.04  | 1016.9 | 7.2995 | 800.11 | 332.03 |
| ANNANDALE (VA)     | 58.741 | 16.676 | 5.7304 | 3.03  | 1017.8 | 6.713  | 838.27 | 394.4  |
| ALLENTOWN (PA)     | 52.326 | 17.2   | 6.0619 | 2.764 | 1017.2 | 7.1342 | 913.72 | 349.91 |
| ATLANTIC CITY (NJ) | 53.74  | 16.458 | 7.6084 | 3.373 | 1017.5 | 7.0062 | 717.78 | 378.46 |
| BALTIMORE (MD)     | 57.944 | 16.971 | 1.1096 | 2.204 | 1017.3 | 6.8877 | 826.08 | 382.96 |
| BIRMINGHAM (AL)    | 63.389 | 14.704 | 5.1809 | 2.68  | 1018.5 | 5.2339 | 721.55 | 242.22 |
| BUFFALO (NY)       | 49.424 | 17.626 | 8.7639 | 3.963 | 1016.6 | 6.9338 | 900.84 | 348.77 |
| CHARLESTON (WV)    | 55.35  | 16.273 | 3.4363 | 2.356 | 1017.9 | 6.0451 | 890.11 | 342.55 |
| CINCINNATI (OH)    | 54.801 | 17.062 | 5.1913 | 2.925 | 1018.2 | 6.3209 | 808.17 | 294.22 |
| COLUMBUS (OH)      | 53.521 | 17.908 | 7.0935 | 3.248 | 1017.5 | 6.3982 | 754.79 | 279.81 |
| DETROIT (MI)       | 51.119 | 18.661 | 7.3579 | 2.797 | 1017.1 | 6.9953 | 805.92 | 298.87 |
| ELIZABETH (NJ)     | 55.833 | 17.247 | 8.5993 | 3.067 | 1017.1 | 6.9703 | 833.29 | 360.49 |
| FORT WORTH (TX)    | 66.036 | 15.782 | 8.0772 | 3.272 | 1016.3 | 6.354  | 956.74 | 363.22 |
| GETTYSBURG (PA)    | 52.676 | 17.307 | 3.8779 | 2.764 | 1017.4 | 7.073  | 904.36 | 372.04 |
| HARRISBURG (PA)    | 53.47  | 17.201 | 5.8338 | 2.746 | 1017.6 | 7.0172 | 920.47 | 376.52 |
| HOUSTON (TX)       | 69.998 | 12.062 | 6.5877 | 2.703 | 1017.3 | 5.409  | 719.02 | 246    |



|                        |        |        |        |       |        |        |        |        |
|------------------------|--------|--------|--------|-------|--------|--------|--------|--------|
| KANSAS CITY (KS)       | 57.057 | 19.047 | 7.4327 | 2.892 | 1016.5 | 7.4033 | 774.88 | 327.76 |
| LANCASTER (PA)         | 53.225 | 17.124 | 6.4507 | 3.267 | 1017.3 | 6.8589 | 813.38 | 349.59 |
| LOS ANGELES (CA)       | 61.637 | 5.9332 | 4.3275 | 1.346 | 1015.3 | 3.6773 | 688.46 | 289.76 |
| MILWAUKEE (WI)         | 49.333 | 19.364 | 8.897  | 2.716 | 1016.7 | 7.0566 | 755.29 | 290.35 |
| NEW HAVEN (CT)         | 51.805 | 16.36  | 7.2352 | 3.699 | 1016.3 | 7.6824 | 810.43 | 389.74 |
| OKLAHOMA CITY<br>(OK)  | 61.147 | 17.131 | 10.008 | 3.882 | 1016   | 7.106  | 903.36 | 360.61 |
| PATERSON (NJ)          | 53.357 | 17.361 | 4.4319 | 2.469 | 1017.6 | 7.1714 | 852.93 | 359.87 |
| PITTSBURGH (PA)        | 52.39  | 17.715 | 6.6679 | 2.795 | 1017.7 | 6.5152 | 905.4  | 338.49 |
| PORTLAND (OR)          | 53.982 | 10.889 | 6.537  | 3.017 | 1017.9 | 6.2168 | 935.75 | 353.27 |
| RENO (NV)              | 55.328 | 16.353 | 5.3966 | 3.13  | 1015.7 | 6.3143 | 1341.8 | 478.67 |
| SAN DIEGO (CA)         | 62.323 | 7.0138 | 4.6307 | 1.496 | 1015.3 | 3.5959 | 577.79 | 257.96 |
| SARASOTA (FL)          | 72.518 | 8.8574 | 6.9766 | 2.32  | 1017.1 | 3.901  | 697.91 | 259.18 |
| ST. LOUIS (MO)         | 56.669 | 17.858 | 6.177  | 2.874 | 1017.7 | 6.5894 | 783.97 | 302.61 |
| TACOMA (WA)            | 51.749 | 9.1319 | 5.6641 | 2.765 | 1017.4 | 6.5829 | 958.88 | 516.13 |
| UPPER MARLBORO<br>(MD) | 56.317 | 16.477 | 7.3649 | 3.111 | 1017.8 | 6.5701 | 806.33 | 398.13 |
| WICHITA (KS)           | 57.455 | 18.761 | 9.8316 | 3.688 | 1016.3 | 7.2897 | 878.93 | 347.83 |
| YORK (PA)              | 51.886 | 16.525 | 4.3663 | 2.983 | 1017.4 | 6.8371 | 836.93 | 360.16 |
| GREENSBURG (PA)        | 53.893 | 17.814 | 6.0288 | 3.177 | 1017.5 | 6.4023 | 917.81 | 327.76 |
| KENOSHA (WI)           | 47.064 | 19.184 | 8.467  | 3.282 | 1017.4 | 7.078  | 735.08 | 278.96 |
