# Supplementary material
Source: PubMed Central journal article supplement (PMC6375387)
Supplement: ehp2732.smcontents.508.pdf [file ehp2732.smcontents.508.pdf]

**Note to readers with disabilities:** *EHP* strives to ensure that all journal content is accessible to all readers. However, some figures and Supplemental Material published in *EHP* articles may not conform to [508 standards](#) due to the complexity of the information being presented. If you need assistance accessing journal content, please contact [ehp508@niehs.nih.gov](mailto:ehp508@niehs.nih.gov). Our staff will work with you to assess and meet your accessibility needs within 3 working days.

### **Supplemental Material**

#### **A National Multicity Analysis of the Causal Effect of Local Pollution, NO<sub>2</sub>, and PM<sub>2.5</sub> on Mortality**

Joel Schwartz, Kelvin Fong, and Antonella Zanobetti

#### **Table of Contents**

**Table S1.** City-specific mean and standard deviation (SD) for all-cause mortality, NO<sub>2</sub> and PM<sub>2.5</sub> concentrations (1999-2010).

**Table S2.** City-specific mean and standard deviation (SD) for the weather variables (1999-2010).
